# Supplementary material
Source: Springer Nature journal article supplement (https://www.springermedizin.de/resource/supplementary/13102_2010_49_MOESM3_ESM.pdf/9667622)

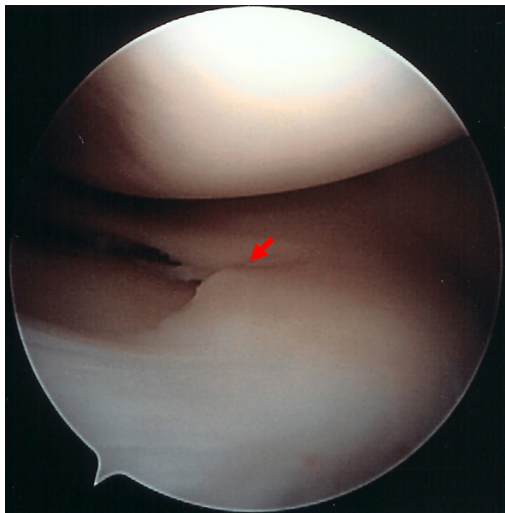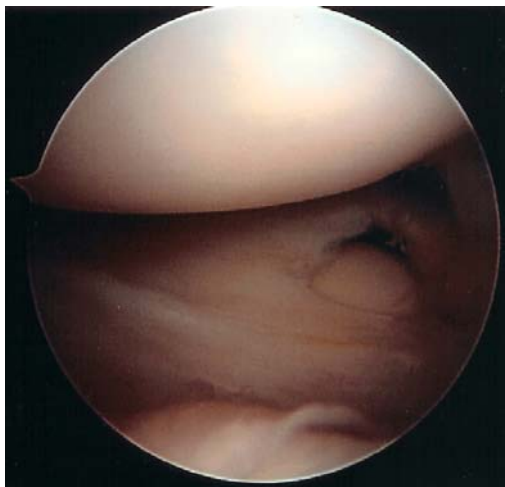

Supplement: MOESM3 [file 9667622]
